# Supplementary material
Source: publisher site journal article supplement (http://www.kjim.org/upload/media/kjim-2021-214-suppl5.pdf)
Supplement: Supplementary file 1 [file kjim-2021-214-suppl5.pdf]

**Supplementary Table 3. Baseline characteristics between individuals with and without new-onset hypertension in the overall population**

| Characteristic                     | New-onset hypertension (-)<br>(n = 85,057) | New-onset hypertension (+)<br>(n = 1,498) | p value |
|------------------------------------|--------------------------------------------|-------------------------------------------|---------|
| Age                                | 36.2 ± 5.6                                 | 38.1 ± 6.1                                | < 0.001 |
| Male sex                           | 25,706/85,057 (30.2)                       | 1,498/2,429 (61.7)                        | < 0.001 |
| Body mass index, kg/m <sup>2</sup> | 22.2 ± 3.0                                 | 24.9 ± 3.5                                | < 0.001 |
| Waist circumference, cm            | 78.1 ± 8.7                                 | 86.0 ± 9.4                                | < 0.001 |
| Systolic blood pressure, mmHg      | 103.4 ± 10.8                               | 120.9 ± 9.2                               | < 0.001 |
| Diastolic blood pressure, mmHg     | 66.1 ± 8.1                                 | 79.6 ± 7.0                                | < 0.001 |
| Total cholesterol, mmol/L          | 4.87 ± 0.83                                | 5.23 ± 0.88                               | < 0.001 |
| Triglycerides, mmol/L              | 0.86 (0.64–1.20)                           | 1.25 (0.88–1.80)                          | < 0.001 |
| LDL-C, mmol/L                      | 2.92 ± 0.77                                | 3.34 ± 0.83                               | < 0.001 |
| HDL-C, mmol/L                      | 1.60 ± 0.38                                | 1.41 ± 0.36                               | < 0.001 |
| Glucose, mmol/L                    | 5.10 ± 0.56                                | 5.38 ± 0.80                               | < 0.001 |
| HemoglobinA <sub>1c</sub> , %      | 5.56 ± 0.33                                | 5.65 ± 0.45                               | < 0.001 |
| Creatinine, μmol/L                 | 69.7 ± 15.3                                | 79.7 ± 21.0                               | < 0.001 |
| Uric acid, μmol/L                  | 282.2 ± 78.7                               | 340.8 ± 91.4                              | < 0.001 |
| hsCRP, mg/L                        | 0.4 (0.2–0.7)                              | 0.6 (0.3–1.2)                             | < 0.001 |
| Alcohol consumption, g/day         | 1 (1–1)                                    | 1 (1–1)                                   | < 0.001 |
| Vigorous exercise (≥ 5 times/week) | 2,877/83,585 (3.4)                         | 82/2,374 (3.5)                            | 0.975   |
| Diabetes mellitus                  | 982/85,048 (1.2)                           | 88/2,426 (3.6)                            | < 0.001 |

Values are presented as mean ± standard deviation, number (%), or median (interquartile). Triglyceride, hsCRP, and alcohol consumption were log-transformed for this analysis. p values were based on Student's *t* test or chi-square test.

LDL-C, low density lipoprotein cholesterol; HDL-C, high density lipoprotein cholesterol; hsCRP, high-sensitivity C-reactive protein.
